# Supplementary material for: End-of-life care for people with severe mental illness: mixed methods systematic review and thematic synthesis of published case studies (the MENLOC study)
Source: HighWire-hosted journal article supplement (doi:10.1136/bmjopen-2021-053223), 2022-02-01
Supplement: bmjopen-2021-053223supp005_data_supplement.pdf [file bmjopen-2021-053223supp005_data_supplement.pdf]

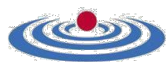

THE JOANNA BRIGGS INSTITUTE

**JBI Critical Appraisal Checklist for Case Reports**

|               |  |
|---------------|--|
| Reviewer      |  |
| Date reviewed |  |
| Author        |  |
| Year          |  |

|                                                                                         | Yes                      | No                       | Unclear                  | Not applicable           |
|-----------------------------------------------------------------------------------------|--------------------------|--------------------------|--------------------------|--------------------------|
| 1. Were patient's demographic characteristics clearly described?                        | <input type="checkbox"/> | <input type="checkbox"/> | <input type="checkbox"/> | <input type="checkbox"/> |
| 2. Was the patient's history clearly described and presented as a timeline?             | <input type="checkbox"/> | <input type="checkbox"/> | <input type="checkbox"/> | <input type="checkbox"/> |
| 3. Was the current clinical condition of the patient on presentation clearly described? | <input type="checkbox"/> | <input type="checkbox"/> | <input type="checkbox"/> | <input type="checkbox"/> |
| 4. Were diagnostic tests or assessment methods and the results clearly described?       | <input type="checkbox"/> | <input type="checkbox"/> | <input type="checkbox"/> | <input type="checkbox"/> |
| 5. Was the intervention(s) or treatment procedure(s) clearly described?                 | <input type="checkbox"/> | <input type="checkbox"/> | <input type="checkbox"/> | <input type="checkbox"/> |
| 6. Was the post-intervention clinical condition clearly described?                      | <input type="checkbox"/> | <input type="checkbox"/> | <input type="checkbox"/> | <input type="checkbox"/> |
| 7. Were adverse events (harms) or unanticipated events identified and described?        | <input type="checkbox"/> | <input type="checkbox"/> | <input type="checkbox"/> | <input type="checkbox"/> |
| 8. Does the case report provide takeaway lessons?                                       | <input type="checkbox"/> | <input type="checkbox"/> | <input type="checkbox"/> | <input type="checkbox"/> |

Overall appraisal: Include  Exclude  Seek further info 

Comments (including reason for exclusion):

|  |
|--|
|  |
|--|
